# Supplementary material for: Rapid and highly selective detection of chlorogenic acid in fruit samples by Fe3O4@SiO2@PIL with boron affinity via a fluorescence enhanced strategy
Source: Royal Society of Chemistry journal article supplement (doi:10.1039/d2nj04750k), 2022-11-28
Supplement: d2nj04750k1.pdf [file d2nj04750k1.pdf]

## Electronic Supplementary Information

### Enhanced fluorescence sensing based on boron affinity

### $\text{Fe}_3\text{O}_4@\text{SiO}_2 @\text{PIL}$ and its high selectivity and rapid

### detection of chlorogenic acid in fruit samples

Tiantian Wan<sup>a,c</sup>, Zulei Zhang<sup>a,b\*</sup>, Hailong Wang<sup>a</sup>, Yiwen Yang<sup>a</sup>, Hanxing Yang<sup>a,c</sup>, Jian Zhang<sup>a,b</sup>, Yanbo Zeng<sup>a</sup>, Lei Li<sup>a\*</sup> and Jinchun Li<sup>c</sup>

<sup>a</sup>College of Biology and Chemical Engineering, Jiaying University, Jiaying 314001, China

<sup>b</sup>Analytical & Testing Center, Jiaying University, Jiaying 314001, China

<sup>c</sup>School of Petrochemical Engineering, Changzhou University, Changzhou 213016, China

**\*Corresponding author:** Dr. Zulei Zhang, Professor Lei Li

**Email:** jerry3641172@126.com, lei.li@mail.zjxu.edu.cn

**Fax:** +86-573-83646203; **Tel:** +86-573-83646203

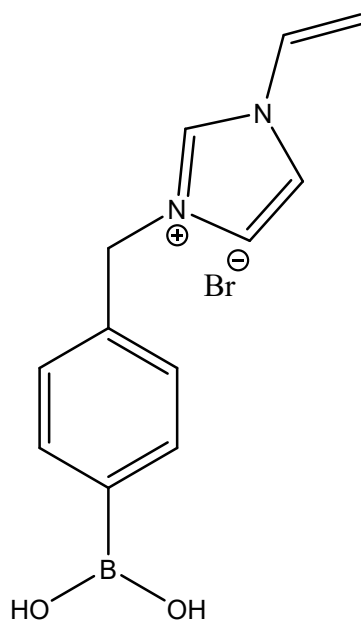

Compound A

Compound A {(3-(4-boronobenzyl)-1-vinyl-1H-imidazol-3-ium) bromide}. <sup>1</sup>H NMR (400 MHz, CD<sub>3</sub>OD): δ = 5.43 (dd, *J* = 2.2, 8.8 Hz, 1H), 5.47 (s, 2H), 5.93 (dd, *J* = 2.4, 15.6 Hz, 1H), 7.20-7.30 (m, 1H), 7.43 (d, *J* = 7.2 Hz, 2H), 7.64-7.88 (m, 3H), 8.02 (s, 1H), 9.42 (s, 1H); <sup>13</sup>C NMR (100 MHz, CD<sub>3</sub>OD): δ = 52.98, 108.66, 119.51, 119.55 (2C), 123.04 (2C), 127.42(2C), 128.38, 134.42, 135.19.

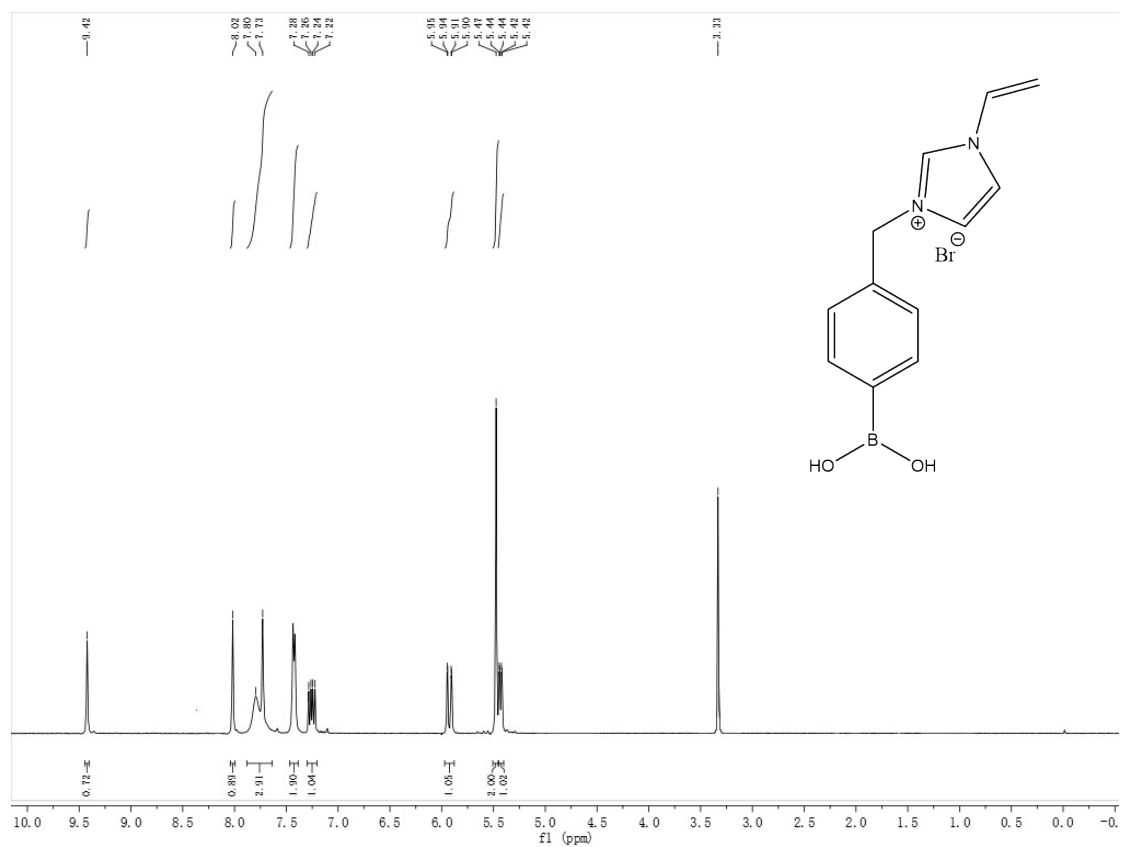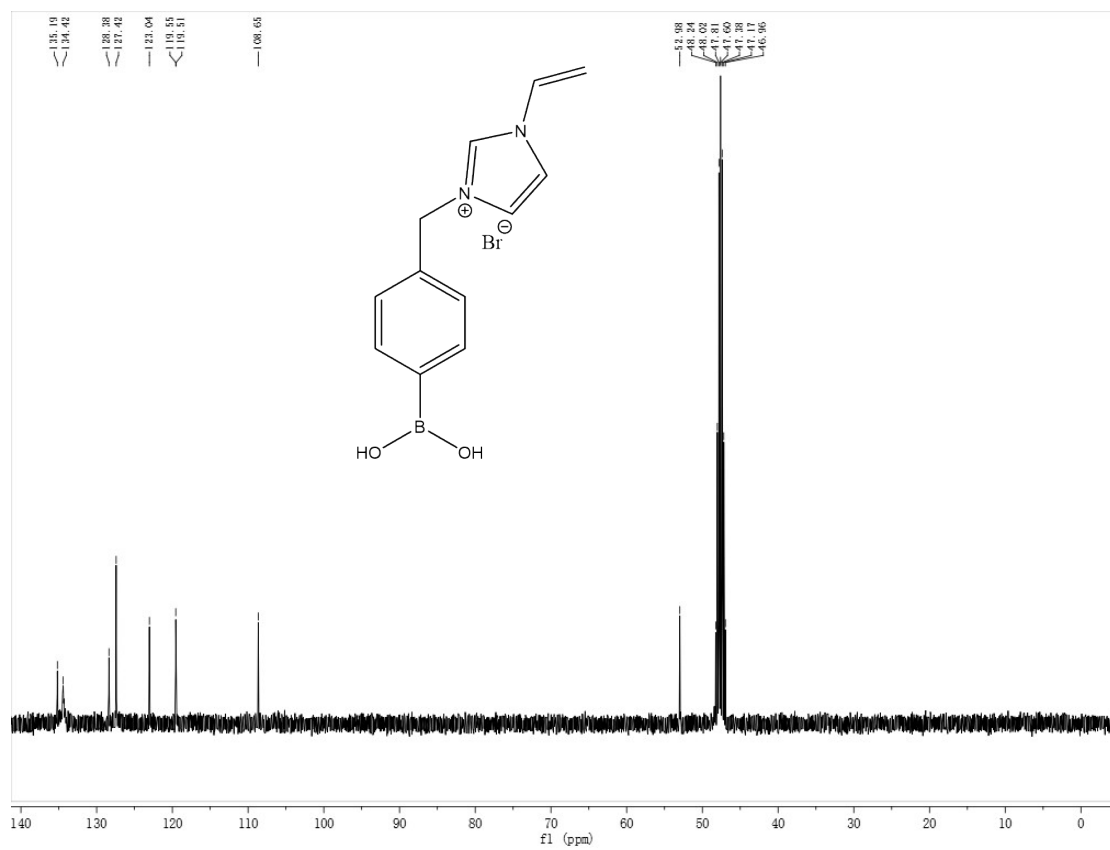

**Fig.S1** <sup>1</sup>H NMR and <sup>13</sup>C NMR spectra of Compound A

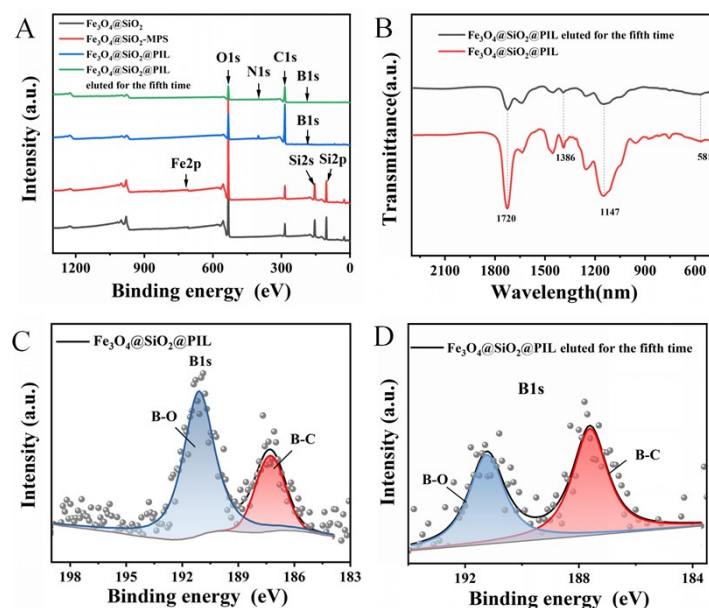

**Fig.S2** (A) XPS analysis of several materials; (B) Infrared spectra of  $\text{Fe}_3\text{O}_4@\text{SiO}_2@\text{PIL}$  and  $\text{Fe}_3\text{O}_4@\text{SiO}_2@\text{PIL}$  eluted for fifth time; (C) High-resolution scan XPS spectra of B1s of  $\text{Fe}_3\text{O}_4@\text{SiO}_2@\text{PIL}$  and (D)  $\text{Fe}_3\text{O}_4@\text{SiO}_2@\text{PIL}$  eluted for the fifth time.

**Table S1** Comparison  $\text{Fe}_3\text{O}_4@\text{SiO}_2@\text{PIL}$  with other reported materials

| Materials                                       | Method       | Detection limit              | Linear range                     | Ref.      |
|-------------------------------------------------|--------------|------------------------------|----------------------------------|-----------|
| CDs                                             | Fluorescence | 46 nM                        | 1.53-80.0 $\mu\text{mol L}^{-1}$ | 1         |
| SiQDs                                           | Fluorescence | 0.43 $\mu\text{mol L}^{-1}$  | 10-150 $\mu\text{mol L}^{-1}$    | 2         |
| N,S-CDs                                         | Fluorescence | 0.12 $\mu\text{g mL}^{-1}$   | 0.33-29.70 $\mu\text{g mL}^{-1}$ | 3         |
| $\text{SiO}_2@\text{Fe}_3\text{O}_4@\text{PDA}$ | Fluorescence | 0.045 $\mu\text{mol L}^{-1}$ | 0.15-60 $\mu\text{mol L}^{-1}$   | 4         |
| $\text{Fe}_3\text{O}_4@\text{SiO}_2@\text{PIL}$ | Fluorescence | 10 nM                        | 0.025-2 $\mu\text{mol L}^{-1}$   | This work |

#### References

1. H. Yang, L. Yang, Y. Yuan, S. Pan, J. Yang, J. Yan, H. Zhang, Q. Sun and X. Hu, *Spectrochim. Acta A Mol. Biomol. Spectrosc.*, 2017, **189**, 139-146.
2. Y. Liu, L. Cao, M. Zan, J. Peng, P. Wang, X. Pang, Y. Zhang, L. Li, W. Dong, Q. Mei, *Talanta*, 2021, **233**, 122465.
3. Q. Liu, Z. Dong, A. Hao, X. Guo, W. Dong, *Talanta*, 2021, **221**, 121372.
4. J. Zheng, M. Zhang, X. Guo, J. Wang and J. Xu, *Sensor. Actuat. B-Chem.*, 2017, **250**, 8-16.
